# Supplementary material for: A novel multi-dimensional structure of graphene-decorated composite foam for excellent stealth performance in microwave and infrared frequency bands
Source: Royal Society of Chemistry journal article supplement (doi:10.1039/d2ta00030j), 2022-01-01
Supplement: d2ta00030j1.pdf [file d2ta00030j1.pdf]

## Supporting Information

**Table S1.** The density of  $\text{Co}_{1.29}\text{Ni}_{1.71}\text{O}_4/\text{rGO}/\text{CF}$  composite foam

| Sample                                                                    | Density                       |
|---------------------------------------------------------------------------|-------------------------------|
| $\text{Co}_{1.29}\text{Ni}_{1.71}\text{O}_4/\text{rGO}/\text{CF}$ -20wt%  | 8.36 $\text{mg}/\text{cm}^3$  |
| $\text{Co}_{1.29}\text{Ni}_{1.71}\text{O}_4/\text{rGO}/\text{CF}$ -60wt%  | 11.57 $\text{mg}/\text{cm}^3$ |
| $\text{Co}_{1.29}\text{Ni}_{1.71}\text{O}_4/\text{rGO}/\text{CF}$ -80wt%  | 13.89 $\text{mg}/\text{cm}^3$ |
| $\text{Co}_{1.29}\text{Ni}_{1.71}\text{O}_4/\text{rGO}/\text{CF}$ -100wt% | 16.31 $\text{mg}/\text{cm}^3$ |

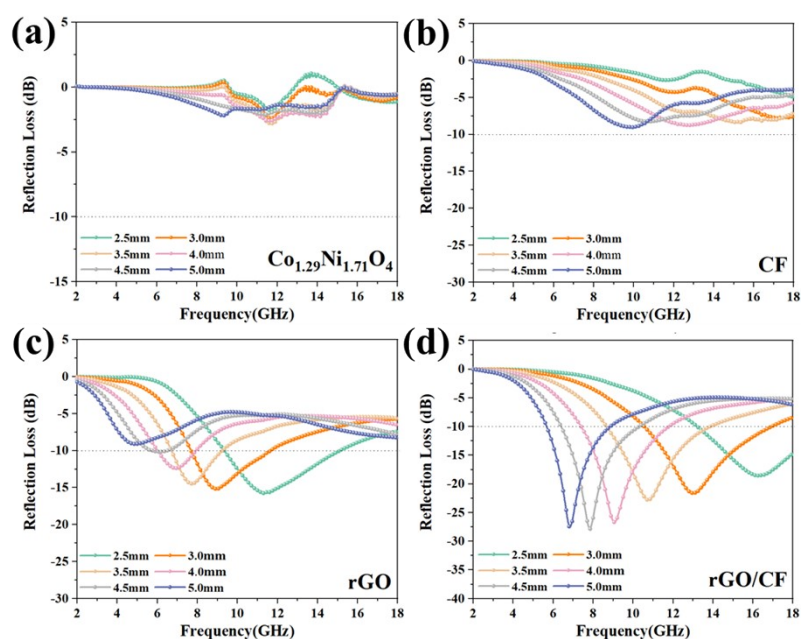

**Fig.S1** The reflection loss patterns of (a)  $\text{Co}_{1.29}\text{Ni}_{1.71}\text{O}_4$ , (b) CF, (c) rGO, (d) rGO/CF.
